July 2014

# PSYCHIATRIC SERVICES

A Journal of the  
American Psychiatric  
Association

- ◆ Peer Recovery Support for Substance Use Disorders: Assessing the Evidence
- ◆ Prevalence of Mental Illness Among U.S. State Prisoners: Possible Sources of Variation
- ◆ Effectiveness of CBT for Drug-Resistant Psychosis: A Meta-Analytic Review
- ◆ Has the ADA Been Reborn as a Tool of Community Change? Two Recent Settlement Cases

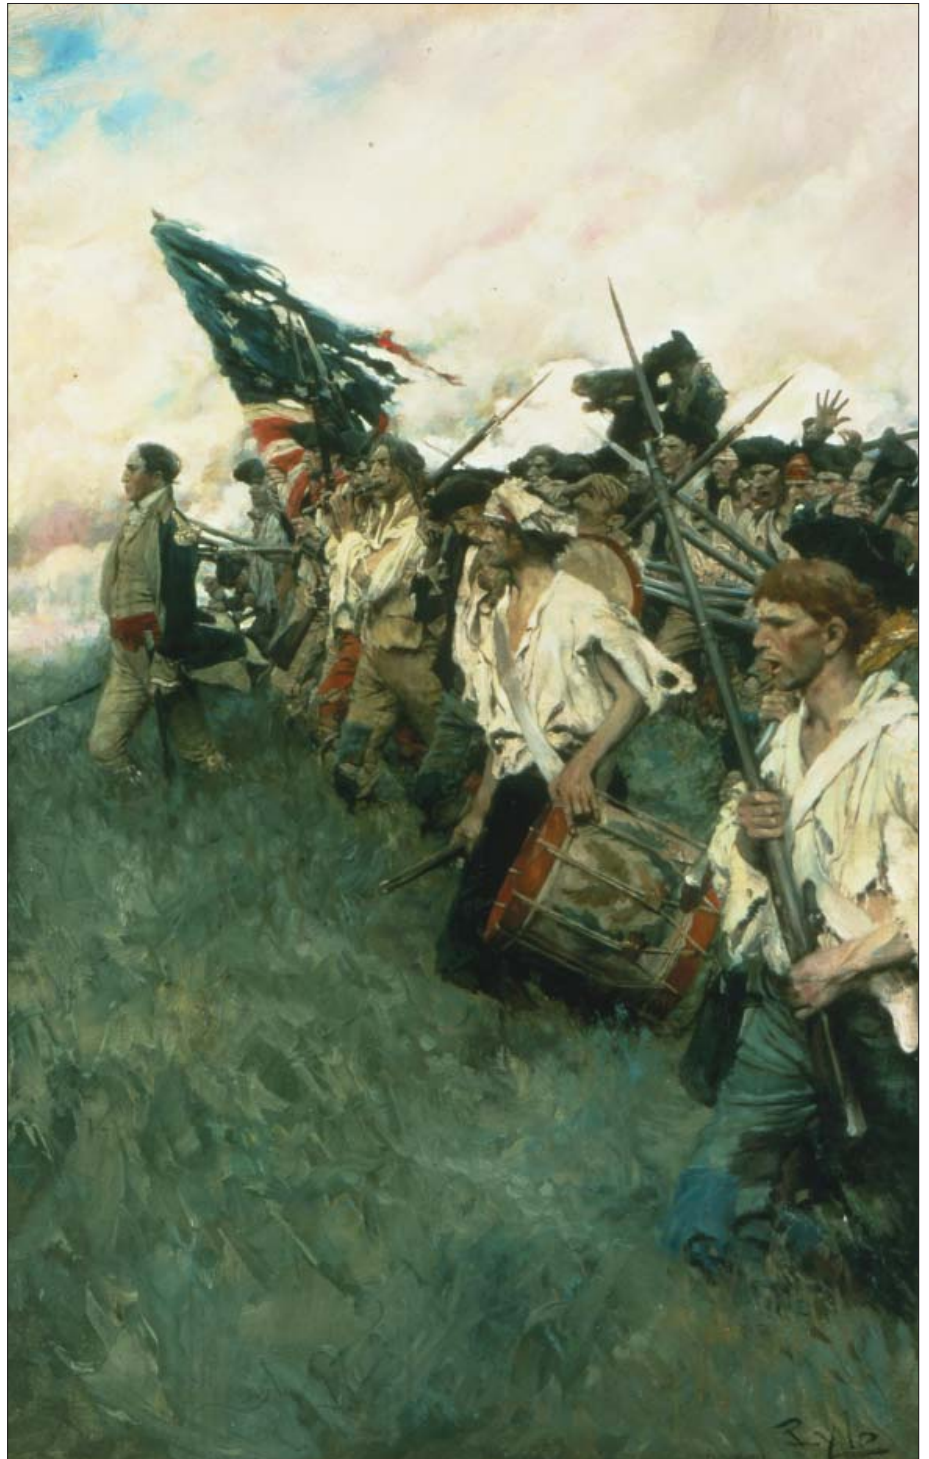

Source: http://ps.psychiatryonline.org/doi/suppl/10.1176/ps.2014.65.issue-7/suppl_file/cover.pdf
