# TAKING ISSUE

## The Role of EBPs in Behavioral Health Treatment

The Substance Abuse and Mental Health Services Administration (SAMHSA) believes that prevention works, treatment is effective, and people living with mental and substance use disorders can and do recover. Implementation of services with demonstrated effectiveness is vital to creating service systems that support recovery and are able to meet America's behavioral health needs. Demonstrating effectiveness, however, is challenging, as has been shown in the Assessing the Evidence Base (AEB) Series, which concludes publication in this issue. Factors such as sample size, the number of studies reviewed, and other design limitations can reduce the strength of the conclusions drawn from studies and reviews.

Evidence is complex and comes in multiple forms. The AEB Series addresses one component of the evidence spectrum—evidence obtained through controlled clinical trials and quasi-experiments. Services assessed through these methods and identified as evidence-based practices (EBPs) are often viewed as the gold standard of clinical care. However, being identified as an EBP, as are the services reviewed in the AEB Series, simply means that the service or program, when designed and delivered as described, is more efficacious than other comparative services for a larger proportion of the population studied. Being identified as an EBP does not mean that a practice is right for everyone, in every setting, and at every time. In fact, the AEB Series has highlighted the need for more research assessing the effectiveness of services for individuals from diverse racial, ethnic, and cultural groups. As insurance coverage increases for behavioral health conditions as a result of the Affordable Care Act and the federal parity law, health care systems will become increasingly diverse. Having a better sense of which services work, for whom, and in what settings will help equip these systems to meet the needs of all people accessing care.

The behavioral health field needs more EBPs and needs more than just EBPs. It also needs innovation and evidence-based thinking at the individual, program, and system levels. Although the AEB Series reviewed traditional research, narrative evidence from individuals who experience disorders, from their families and caregivers, and from the community should also be considered. For many, the best evidence may be from individuals' and families' own histories with services, programs, and practitioners, as well as with peers.

SAMHSA works with academic, research, grantee, and funding partners to support EBPs and to foster new approaches—practice-based evidence—to improve outcomes for individuals, families, and communities. SAMHSA also funds demonstrations, conducts evaluations, disseminates proven and promising models, provides technical assistance, convenes expert panels, and offers strategic dialogue and policy opportunities to advance the behavioral health of the nation. America deserves nothing less.—PAMELA S. HYDE, J.D., *SAMHSA, Rockville, Maryland*, and MIRIAM DELPHIN-RITTMON, PH.D., *Department of Psychiatry, Yale University, New Haven, Connecticut*

*Psychiatric Services*, established in 1950, is published monthly by the American Psychiatric Association for mental health professionals and others concerned with treatment and services for persons with mental illnesses and mental disabilities, in keeping with APA's objectives to improve care and treatment, to promote research and professional education in psychiatric and related fields, and to advance the standards of all psychiatric services and facilities.

### Editor

Howard H. Goldman, M.D., Ph.D.

### Editorial Board

David A. Adler, M.D.

Regina Bussing, M.D., M.S.H.S.

Javier I. Escobar, M.D.

Stephen M. Goldfinger, M.D.

Richard K. Harding, M.D.

Marcela Horvitz-Lennon, M.D., M.P.H.

Roberto Lewis-Fernández, M.D.

Mark R. Munetz, M.D.

Martha Sajatovic, M.D.

Gregory E. Simon, M.D., M.P.H.

T. Scott Stroup, M.D., M.P.H.

Marcia Valenstein, M.D., M.S.

### Editor Emeritus

John A. Talbott, M.D.

### Book Review Editor

Jeffrey L. Geller, M.D., M.P.H.

### Contributing Editors

Paul S. Appelbaum, M.D., *Law & Psychiatry*

José Miguel Caldas de Almeida, M.D., and Matt Muijen, M.D., Ph.D., *Global Mental Health Reforms*

Francine Cournois, M.D., and Stephen M. Goldfinger, M.D., *Frontline Reports*

Lisa B. Dixon, M.D., M.P.H., and Brian Hepburn, M.D., *Research and Services Partnerships*

Benjamin G. Druss, M.D., M.P.H., *Integrated Care*

Jeffrey L. Geller, M.D., M.P.H., *Personal Accounts*

Marcela Horvitz-Lennon, M.D., M.P.H., *Best Practices*

Amy M. Kilbourne, Ph.D., M.P.H., and Tami L. Mark, Ph.D., *Datapoints*

Fred C. Osher, M.D., and Marvin S. Swartz, M.D., *State Mental Health Policy*

Jules M. Ranz, M.D., Susan M. Deakins, M.D., and Stephanie Le Melle, M.D., *Case Studies in Public-Sector Leadership*

Steven S. Sharfstein, M.D., Haiden A. Huskamp, Ph.D., and Alison Evans

Cuellar, Ph.D., *Economic Grand Rounds*

### Statistical Consultant

Deborah R. Medoff, Ph.D.

### Editorial Consultants

Joseph M. Cerimele, M.D.

Julie M. Donohue, Ph.D.

Robert E. Drake, M.D., Ph.D.

M. Susan Ridgely, J.D.

Laura Van Tosh

### Editorial Staff

Constance Grant Gartner, *Managing Editor*

Demarie S. Jackson, *Associate Editor*

Kathleen Stearman, *Associate Editor*

Wendy Lieberman Taylor, *Production Manager*

Y. Nicole Gray, *Editorial Support Services Manager*

### Publisher

Rebecca D. Rinehart

### American Psychiatric Association

Paul Summergrad, M.D., *President*

Renée L. Binder, M.D., *President-Elect*

Maria A. Oquendo, M.D., *Secretary*

Frank Brown, M.D., *Treasurer*

Jenny L. Boyer, M.D., *Speaker, APA Assembly*

Saul Levin, M.D., M.P.A., *Chief Executive Officer and Medical Director*
